# Supplementary material for: Soil nutritional sustainability in Cerrado Oxisols using a fuzzy index (FSNSI)
Source: Research Square preprint supplement (doi:10.21203/rs.3.rs-8467216/v1), 2026-01-16
Supplement: Supplementary file 1 [file 3483370f30906db2808630e1.docx]

# Appendices

## Appendix 1. Phytosociological parameters of the Cerrado sensu stricto area

| **Species** | **RD (%)** | **RDM (%)** | **RF (%)** | **IVI (%)** |
| --- | --- | --- | --- | --- |
| *Psidium firmum* | 6.25 | 6.15 | 6.25 | 18.66 |
| *Salvertia convallariodora* | 0.89 | 1.06 | 0.89 | 2.85 |
| *Eugenia dysenterica* | 3.57 | 3.74 | 3.57 | 10.89 |
| *Anacardium occidentale* | 1.78 | 1.46 | 1.78 | 5.04 |
| *Plathymenia reticulata* | 5.35 | 3.39 | 5.35 | 14.11 |
| *Anadenanthera peregrina* | 5.35 | 5.58 | 5.35 | 16.30 |
| *Dimorphandra mollis* | 0.89 | 0.34 | 0.89 | 2.13 |
| *Astronium fraxinifolium* | 2.67 | 2.63 | 2.67 | 7.99 |
| *Pseudobombax tomentosum* | 4.46 | 3.72 | 4.46 | 12.66 |
| *Piptadenia gonoacantha* | 2.67 | 3.07 | 2.67 | 8.43 |
| *Hymenaea courbaril* | 4.46 | 3.85 | 4.46 | 12.79 |
| *Mabea fistulifera* | 3.57 | 3.98 | 3.57 | 11.13 |
| *Byrsonima spicata* | 7.14 | 7.41 | 7.14 | 21.70 |
| *Guazuma ulmifolia* | 6.25 | 8.07 | 6.25 | 20.57 |
| *Tabebuia vellosoi* | 0.89 | 0.78 | 0.89 | 2.57 |
| *Qualea parviflora* | 3.57 | 3.75 | 3.57 | 10.90 |
| *Caryocar brasiliense* | 6.25 | 5.88 | 6.25 | 18.38 |
| *Curatella americana* | 12.50 | 11.88 | 12.50 | 36.89 |
| *Pterodon* sp. | 11.60 | 13.42 | 11.60 | 36.64 |
| *Magonia pubescens* | 9.82 | 9.73 | 9.82 | 29.38 |

##

## Appendix 2. Physical soil attributes

### Depth: 0-10 cm

| Land use | Sand (g kg⁻¹) | Silt (g kg⁻¹) | Clay (g kg⁻¹) | Bulk density (g cm⁻³) |
| --- | --- | --- | --- | --- |
| Cerrado | 614.0±3.1 | 79.6±2.5 | 306.4±4.5 | 1.17±0.01 |
| Teak | 614.5±1.5 | 79.5±3.5 | 306.0±4.2 | 1.11±0.01 |
| Mahogany | 614.1±3.5 | 79.4±2.7 | 306.5±4.4 | 1.20±0.01 |
| Eucalyptus | 614.2±1.2 | 79.7±3.2 | 306.1±4.2 | 1.25±0.02 |
| Agriculture | 614.8±2.5 | 79.0±3.1 | 306.2±5.3 | 1.35±0.01 |
